# Supplementary material for: Upregulated Vanins and their potential contribution to periodontitis
Source: PubMed Central journal article supplement (PMC9758802; doi:10.1186/s12903-022-02583-7), 2022-12-17

# Supplementary Figure 1

A

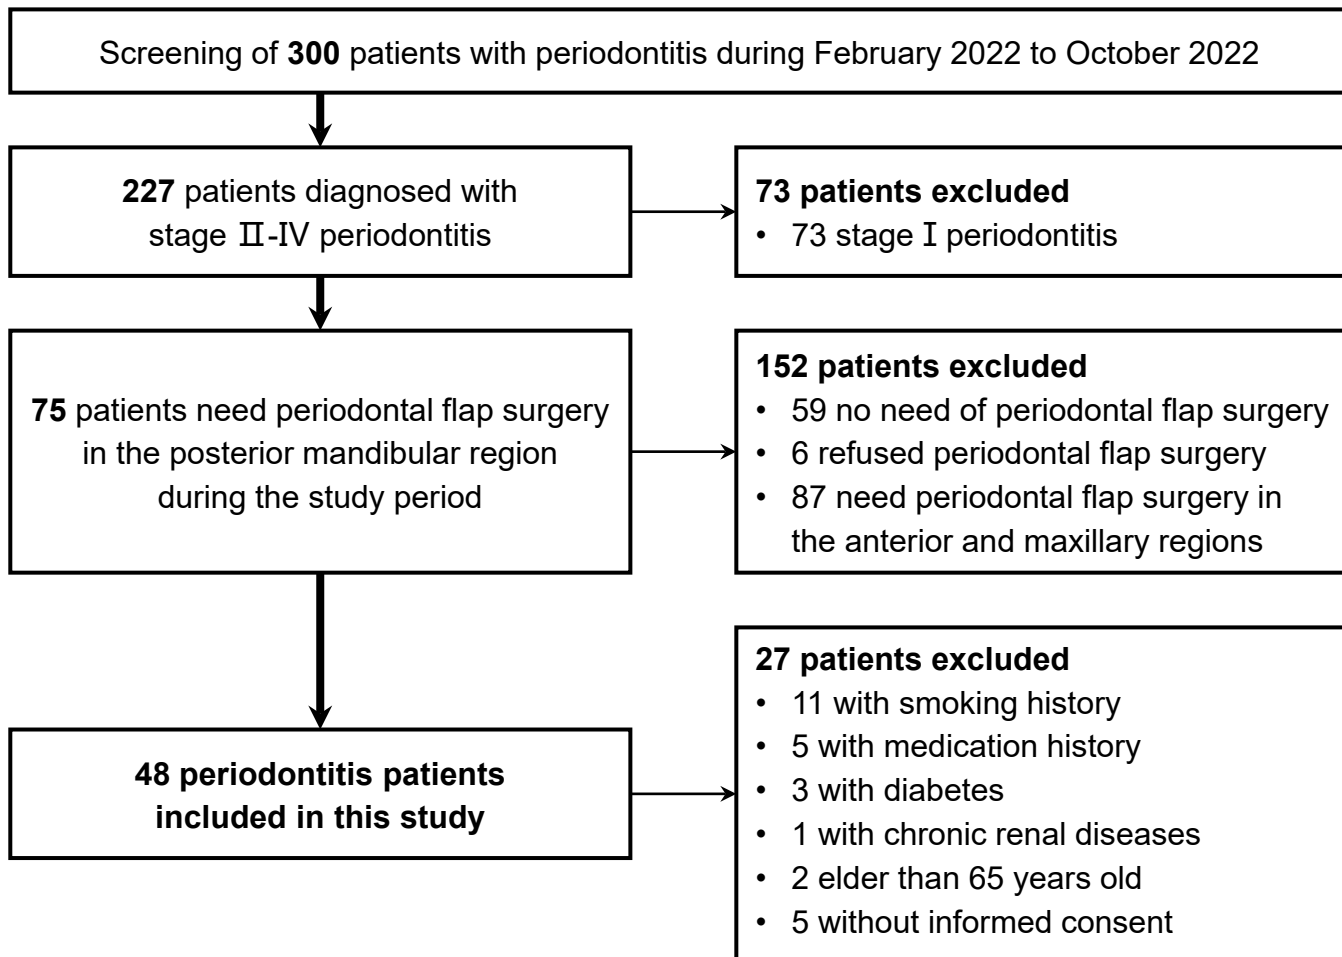

B

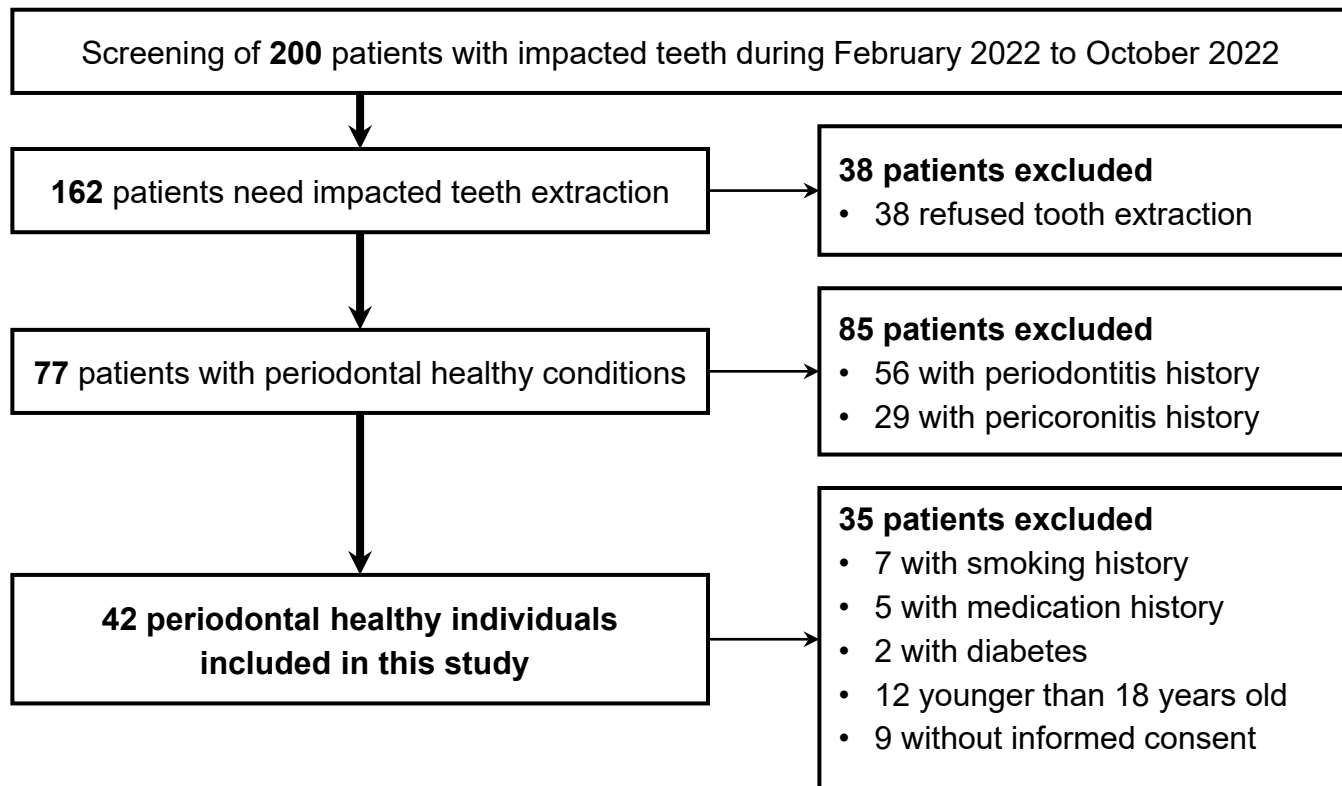

## Supplementary Figure 2

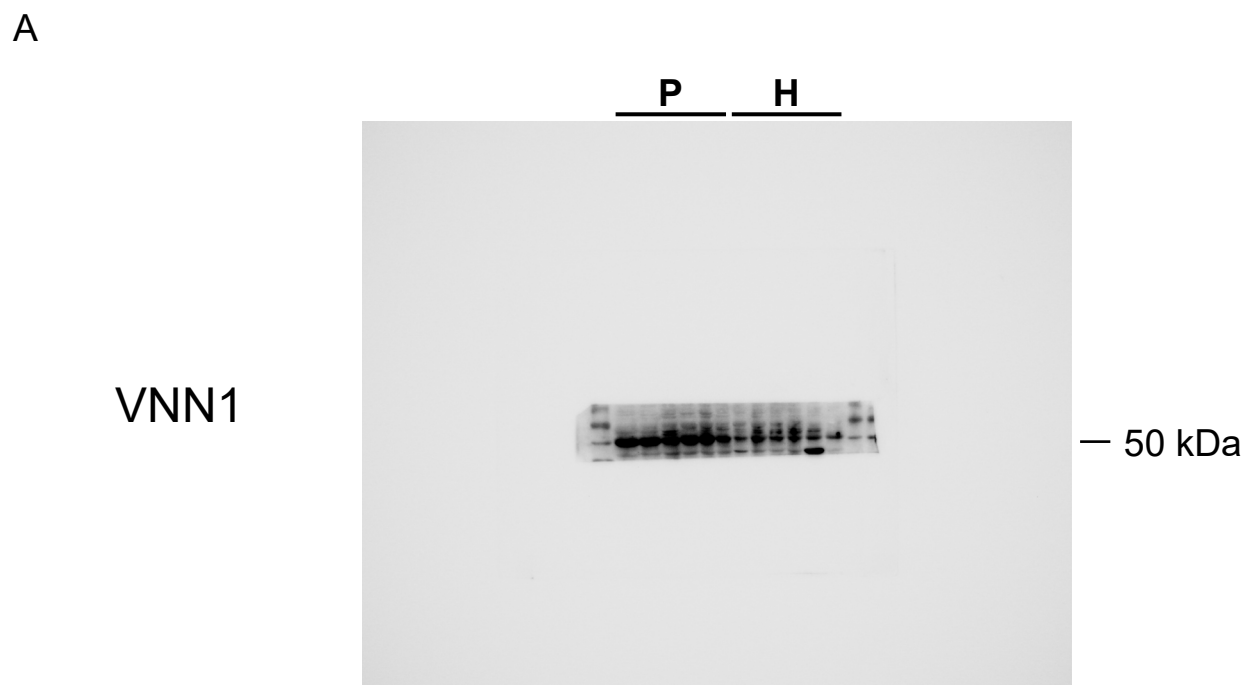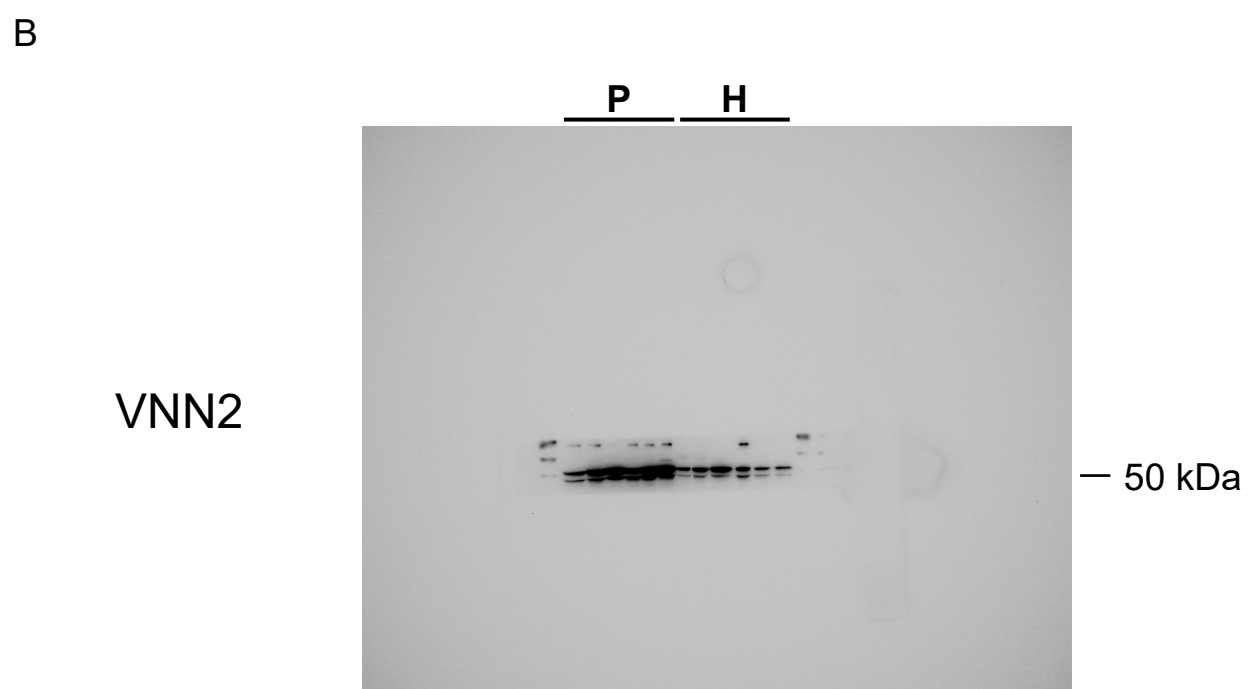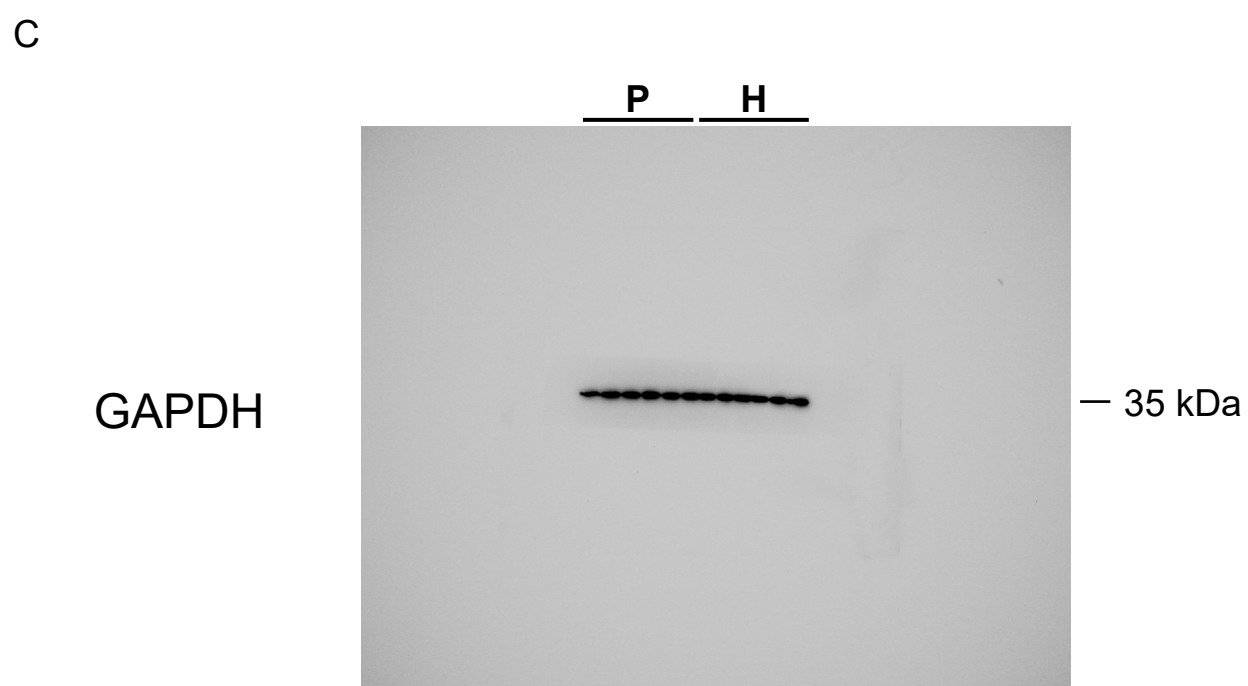

Supplement: 12903_2022_2583_MOESM2_ESM.pdf [file 12903_2022_2583_MOESM2_ESM.pdf]
